# Supplementary material
Source: Springer Nature journal article supplement (http://www.springermedizin.de/resource/supplementary/13075_2013_4057_MOESM5_ESM.pdf/9695954)

**A**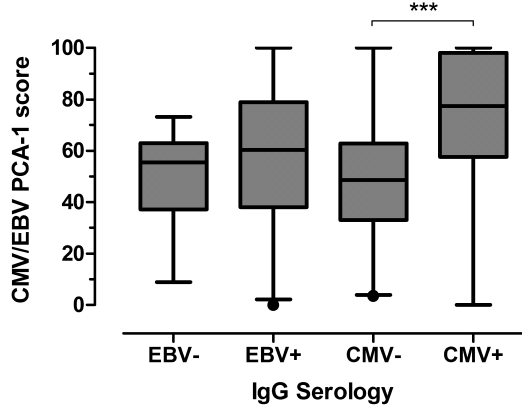

- CMV IgG-
- CMV IgG+

**B**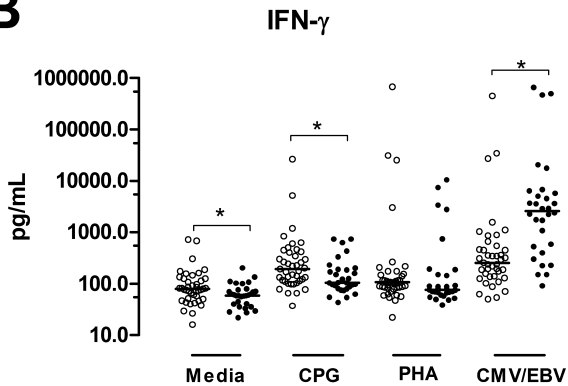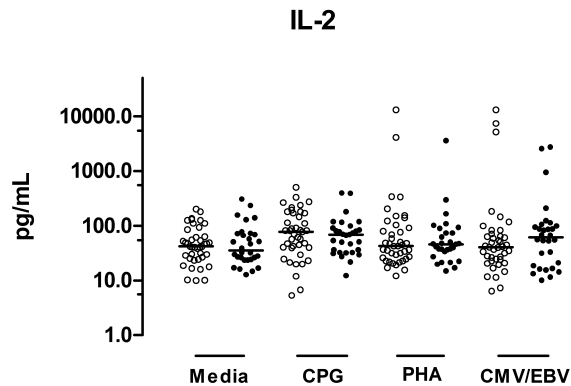

Supplement: MOESM5 [file 9695954]
